# Supplementary material for: Physics-inspired machine learning of localized intensive properties
Source: Chem Sci. 2023 Apr 10;14(18):4913–22. doi: 10.1039/d3sc00841j (PMC10171074; doi:10.1039/d3sc00841j)
Supplement: SC-014-D3SC00841J-s002 [file SC-014-D3SC00841J-s002.csv]

Backbones	Sidegroups
CC(R)	F
CC(R)CC	Cl
C(R)CCC	Br
CCC(R)CCC	$\rm CF_{3}$
C(R)CCCCC	CN
C(R)CCCC(R)C	$\rm NO_{2}$
C(R)CCCCC(R)	CHO
C(R)CCCCCCC	COOH
CC(R)CCCCCC	$\rm C(O)Me$
CCC(R)CCCCC	$\rm C(O)NH_{2}$
CCCC(R)CCCC	CCH
CC(R)CCCC(R)CC	$\rm SO_{2}Me$
C(R)CCCCC(R)CC	CH=NH
C(R)CCCC(R)CCC	OH
C(R)CCCCCC(R)C	$\rm OMe$
C(R)CCCCCCC(R)	$\rm NH_{2}$
C=C(R)	$\rm NMe_{2}$
C=C(R)C=C	$\rm Me$
C(R)=CC=C	$\rm NHC(O)Me$
C=CC(R)=CC=C	$\rm SMe$
C(R)=CC=CC=C	c1ccc(F)cc1
C(R)=CC=CC(R)=C	c1ccc(Cl)cc1
C(R)=CC=CC=C(R)	c1ccc(Br)cc1
C(R)=CC=CC=CC=C	c1ccc([C](F)(F)F)cc1
C=C(R)C=CC=CC=C	c1ccc([C]#N)cc1
C=CC(R)=CC=CC=C	c1ccc(N(=O)=O)cc1
C=CC=C(R)C=CC=C	c1ccc([CH]=O)cc1
C=C(R)C=CC=C(R)C=C	c1ccc([C](=O)O)cc1
C(R)=CC=CC=C(R)C=C	c1ccc(C(=O)C)cc1
C(R)=CC=CC(R)=CC=C	c1ccc(C(=O)N)cc1
C(R)=CC=CC=CC(R)=C	c1ccc(C#C)cc1
C(R)=CC=CC=CC=C(R)	c1ccc(S(=O)(=O)C)cc1
	c1ccc(C=N)cc1
	c1ccc([OH])cc1
	c1ccc(OC)cc1
	c1ccc([NH2])cc1
	c1ccc(N(C)C)cc1
	c1ccc(C)cc1
	c1ccc(NC(=O)C)cc1
	c1ccc(SC)cc1
	c1ccccc1
