# Supplementary material for: Physics-inspired machine learning of localized intensive properties
Source: Chem Sci. 2023 Apr 10;14(18):4913–22. doi: 10.1039/d3sc00841j (PMC10171074; doi:10.1039/d3sc00841j)
Supplement: SC-014-D3SC00841J-s003 [file SC-014-D3SC00841J-s003.csv]

Method	RMSE (eV)
Sum (SchNet)	0.411 $\pm$ 0.089
Average(SchNet)	0.176 $\pm$ 0.004
Max(SchNet)	0.174 $\pm$ 0.003
Softmax(SchNet)	0.168 $\pm$ 0.003
Coeff(SchNet)	0.161 $\pm$ 0.001
WA	0.164 $\pm$ 0.002
OWA	0.155 $\pm$ 0.002
Ref KRR-MBTR	0.239 $\pm$ 0.006
Ref GNN	0.209
Ref GNN-MBTR-MD	0.180
